# Supplementary material for: New Insights on Lilium Phylogeny Based on a Comparative Phylogenomic Study Using Complete Plastome Sequences
Source: PubMed Central journal article supplement (PMC6963401; doi:10.3390/plants8120547), 2019-11-27
Supplement: plants-08-00547-s001.pdf [file plants-08-00547-s001.pdf]

# Supplementary Material

**Table S1.** Summary of three plastome sequences.

| Taxon                                              | Length (bp) |        |        |         | GC Content (%) |      |      |       |
|----------------------------------------------------|-------------|--------|--------|---------|----------------|------|------|-------|
|                                                    | LSC         | SSC    | IR     | Total   | LSC            | SSC  | IR   | Total |
| <i>Lilium candidum</i>                             | 81,481      | 17,644 | 26,488 | 152,101 | 34.9           | 30.6 | 42.5 | 37.0  |
| <i>Lilium formosanum</i>                           | 82,101      | 17,524 | 26,514 | 152,653 | 34.9           | 30.8 | 42.4 | 37.0  |
| <i>Lilium leichtlinii</i> var. <i>maximowiczii</i> | 82,037      | 17,583 | 26,492 | 152,604 | 34.8           | 30.7 | 42.5 | 37.0  |

**Table S2.** List of estimated species trees according to different options.

| Data Set              | Type            | Tool    | Method                      | Modeltest         | Tree Names           |
|-----------------------|-----------------|---------|-----------------------------|-------------------|----------------------|
| All_lo<br>ci<br>(189) | Partitioned     | RAxML   | Maximum-likelihood analysis | PartitionFinder 2 | ALL_part_RAxML       |
|                       |                 | IQ-TREE | Maximum-likelihood analysis | ModelFinder       | ALL_part_iqtree      |
|                       |                 | MrBayes | Bayesian inference          | PartitionFinder 2 | ALL_part_mrbayes     |
|                       | Non-partitioned | RAxML   | Maximum-likelihood analysis | Jmodeltest 2      | ALL_nonpart_RAxML    |
|                       |                 | IQ-TREE | Maximum-likelihood analysis | Jmodeltest 2      | ALL_nonpart_iqtree   |
|                       |                 | MrBayes | Bayesian inference          | Jmodeltest 2      | ALL_nonpart_mrbayes  |
| CDSs<br>(78)          | Partitioned     | RAxML   | Maximum-likelihood analysis | PartitionFinder 2 | CDSs_part_RAxML      |
|                       |                 | IQ-TREE | Maximum-likelihood analysis | ModelFinder       | CDSs_part_iqtree     |
|                       |                 | MrBayes | Bayesian inference          | PartitionFinder 2 | CDSs_part_mrbayes    |
|                       | Non-partitioned | RAxML   | Maximum-likelihood analysis | Jmodeltest 2      | CDSs_nonpart_RAxML   |
|                       |                 | IQ-TREE | Maximum-likelihood analysis | Jmodeltest 2      | CDSs_nonpart_iqtree  |
|                       |                 | MrBayes | Bayesian inference          | Jmodeltest 2      | CDSs_nonpart_mrbayes |
| IGSs<br>(90)          | Partitioned     | RAxML   | Maximum-likelihood analysis | PartitionFinder 2 | IGSs_part_RAxML      |
|                       |                 | IQ-TREE | Maximum-likelihood analysis | ModelFinder       | IGSs_part_iqtree     |
|                       |                 | MrBayes | Bayesian inference          | PartitionFinder 2 | IGSs_part_mrbayes    |
|                       | Non-partitioned | RAxML   | Maximum-likelihood analysis | Jmodeltest 2      | IGSs_nonpart_RAxML   |
|                       |                 | IQ-TREE | Maximum-likelihood analysis | Jmodeltest 2      | IGSs_nonpart_iqtree  |
|                       |                 | MrBayes | Bayesian inference          | Jmodeltest 2      | IGSs_nonpart_mrbayes |
| Introns               | Partitioned     | RAxML   | Maximum-likelihood analysis | PartitionFinder 2 | INTRONS_part_RAxML   |

|                                                           |                 |                    |                             |                         |                        |
|-----------------------------------------------------------|-----------------|--------------------|-----------------------------|-------------------------|------------------------|
| (21)                                                      |                 | IQ-TREE            | Maximum-likelihood analysis | ModelFinder             | INTRONs_part_iqtree    |
|                                                           |                 | MrBayes            | Bayesian inference          | PartitionFinder 2       | INTRONs_part_mr_bayes  |
|                                                           | Non-partitioned | RAxML              | Maximum-likelihood analysis | Jmodeltest 2            | INTRONs_nonpart_RAxML  |
|                                                           |                 | IQ-TREE            | Maximum-likelihood analysis | Jmodeltest 2            | INTRONs_nonpart_iqtree |
|                                                           | MrBayes         | Bayesian inference | Jmodeltest 2                | INTRONs_nonpart_mrbayes |                        |
| <b>Estimated Species Trees Using Gene Trees by ASTRAL</b> |                 |                    |                             |                         |                        |
| <b>Data</b>                                               |                 |                    | <b>Tree Names</b>           |                         |                        |
| 189 gene trees from CDSs, IGSs, and introns               |                 |                    | ASTRAL_ALL                  |                         |                        |
| 78 gene trees from CDSs                                   |                 |                    | ASTRAL_CDSs                 |                         |                        |
| 90 gene trees from IGSs                                   |                 |                    | ASTRAL_IGSs                 |                         |                        |
| 21 gene trees from introns                                |                 |                    | ASTRAL_INTRONs              |                         |                        |

**Table S3.** 189 loci used for phylogenetic analyses in this paper.

| Data Set         | Locus       | Length | Data Set | Locus        | Length | Data Set         | Locus             | Length |
|------------------|-------------|--------|----------|--------------|--------|------------------|-------------------|--------|
|                  | <i>accD</i> | 1584   |          | <i>psaJ</i>  | 141    |                  | <i>rps4</i>       | 612    |
|                  | <i>atpA</i> | 1524   |          | <i>psbA</i>  | 1062   |                  | <i>rps7</i>       | 468    |
|                  | <i>atpB</i> | 1503   |          | <i>psbB</i>  | 1527   |                  | <i>rps8</i>       | 429    |
|                  | <i>atpE</i> | 408    |          | <i>psbC</i>  | 1422   |                  | <i>rps11</i>      | 423    |
|                  | <i>atpF</i> | 570    |          | <i>psbD</i>  | 1062   |                  | <i>rps12</i>      | 372    |
|                  | <i>atpH</i> | 246    |          | <i>psbE</i>  | 252    |                  | <i>rps14</i>      | 303    |
|                  | <i>atpI</i> | 744    |          | <i>psbF</i>  | 120    | CDS              | <i>rps15</i>      | 273    |
|                  | <i>ccsA</i> | 972    |          | <i>psbH</i>  | 222    |                  | <i>rps16</i>      | 252    |
|                  | <i>cemA</i> | 702    |          | <i>psbI</i>  | 111    |                  | <i>rps18</i>      | 306    |
|                  | <i>clpP</i> | 621    |          | <i>psbJ</i>  | 123    |                  | <i>rps19</i>      | 279    |
|                  | <i>matK</i> | 1557   |          | <i>psbK</i>  | 192    |                  | <i>ycf1</i>       | 5631   |
|                  | <i>ndhA</i> | 1095   |          | <i>psbL</i>  | 117    |                  | <i>ycf2</i>       | 6798   |
|                  | <i>ndhB</i> | 1533   |          | <i>psbM</i>  | 105    |                  | <i>ycf3</i>       | 513    |
|                  | <i>ndhC</i> | 363    |          | <i>psbN</i>  | 132    |                  | <i>ycf4</i>       | 555    |
|                  | <i>ndhD</i> | 1510   |          | <i>psbT</i>  | 102    |                  | <i>accD-psaI</i>  | 1061   |
| CDS <sup>a</sup> | <i>ndhE</i> | 308    | CDS      | <i>psbZ</i>  | 189    |                  | <i>atpB-rbcL</i>  | 876    |
|                  | <i>ndhF</i> | 2308   |          | <i>rbcL</i>  | 1443   | <i>atpF-atpH</i> | 582               |        |
|                  | <i>ndhG</i> | 547    |          | <i>rpl2</i>  | 825    | <i>atpH-atpI</i> | 1098              |        |
|                  | <i>ndhH</i> | 1182   |          | <i>rpl14</i> | 369    | <i>atpI-rps2</i> | 301               |        |
|                  | <i>ndhI</i> | 543    |          | <i>rpl16</i> | 408    | <i>ccsA-ndhD</i> | 194               |        |
|                  | <i>ndhJ</i> | 477    |          | <i>rpl20</i> | 361    | <i>cemA-petA</i> | 261               |        |
|                  | <i>ndhK</i> | 791    |          | <i>rpl22</i> | 412    | <i>clpP-psbB</i> | 522               |        |
|                  | <i>petA</i> | 963    |          | <i>rpl23</i> | 282    | IGS <sup>b</sup> | <i>ndhB-rps7</i>  | 314    |
|                  | <i>petB</i> | 654    |          | <i>rpl32</i> | 195    |                  | <i>ndhC-trnV</i>  | 1121   |
|                  | <i>petD</i> | 504    |          | <i>rpl33</i> | 204    |                  | <i>ndhD-psaC</i>  | 143    |
|                  | <i>petG</i> | 114    |          | <i>rpl36</i> | 114    |                  | <i>ndhE-ndhG</i>  | 235    |
|                  | <i>petL</i> | 96     |          | <i>rpoA</i>  | 1088   |                  | <i>ndhF-rpl32</i> | 791    |
|                  | <i>petN</i> | 90     |          | <i>rpoB</i>  | 3207   |                  | <i>ndhG-ndhI</i>  | 409    |
|                  | <i>psaA</i> | 2253   |          | <i>rpoC1</i> | 2079   |                  | <i>ndhH-rps15</i> | 137    |
|                  | <i>psaB</i> | 2205   |          | <i>rpoC2</i> | 4227   |                  | <i>ndhJ-ndhK</i>  | 187    |
|                  | <i>psaC</i> | 246    |          | <i>rps2</i>  | 711    |                  | <i>petA-psbJ</i>  | 921    |

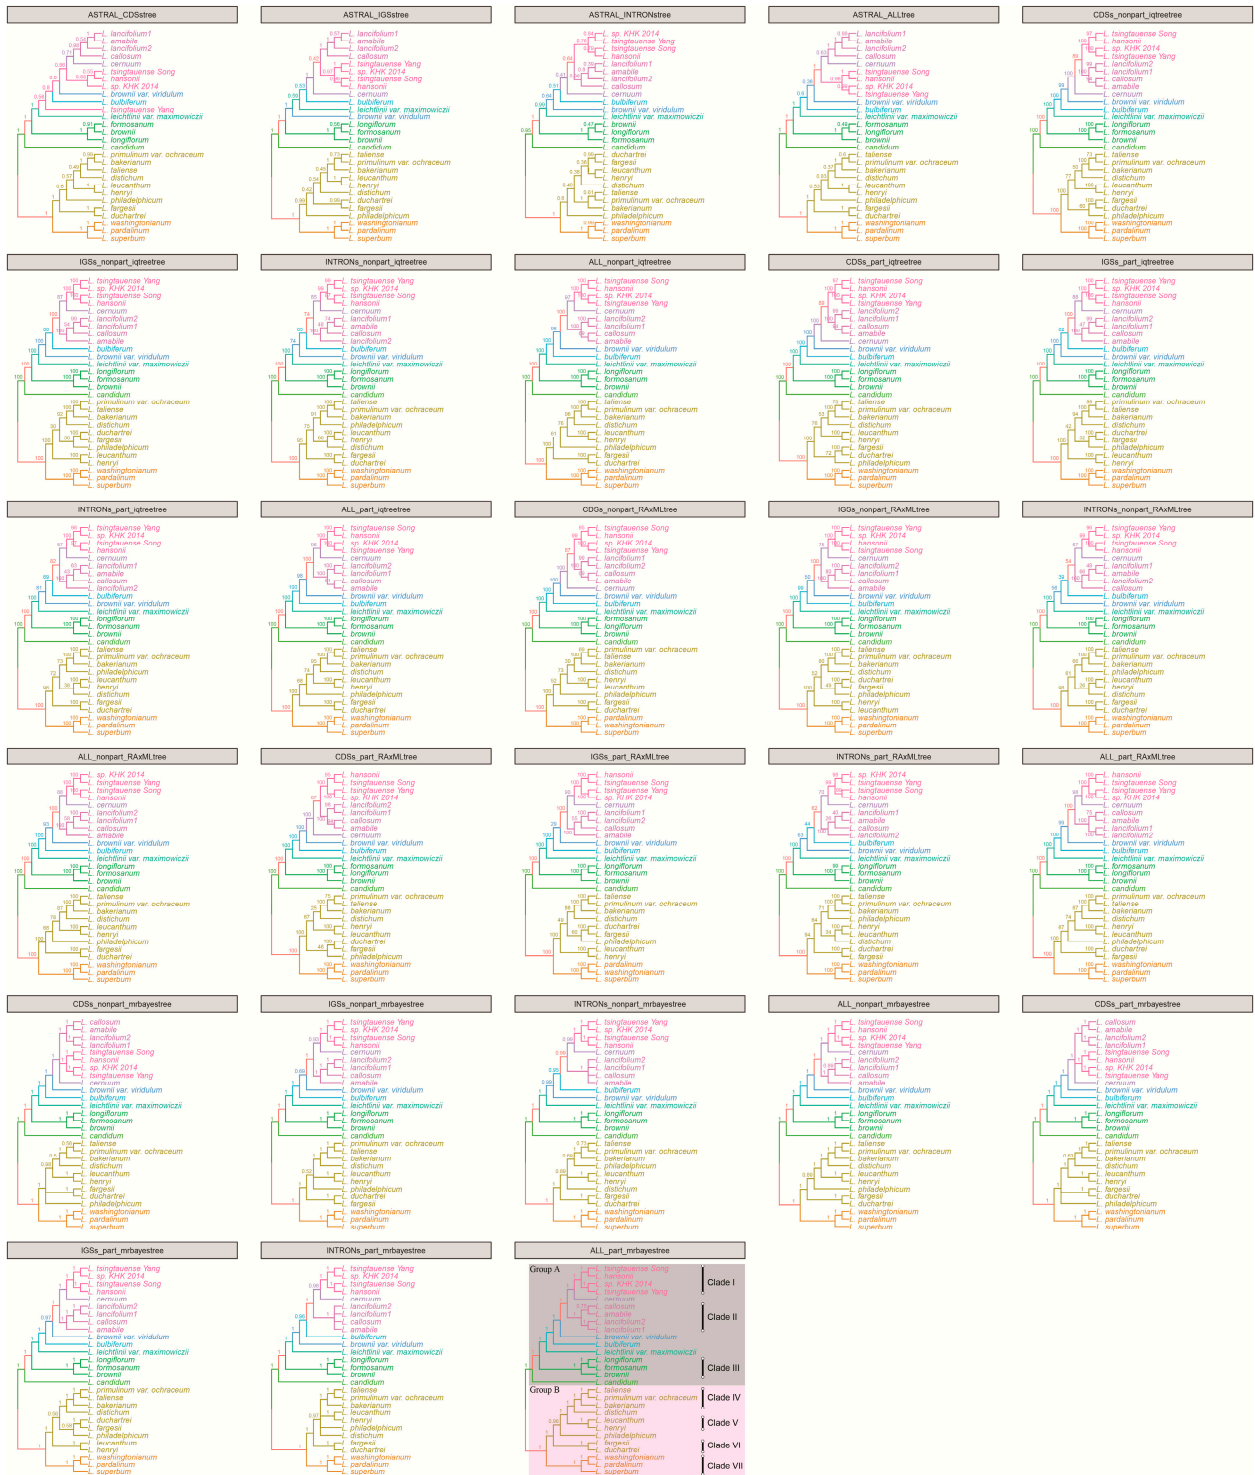

Figure S1. A clade of *Lilium* species extracted from 28 species trees.

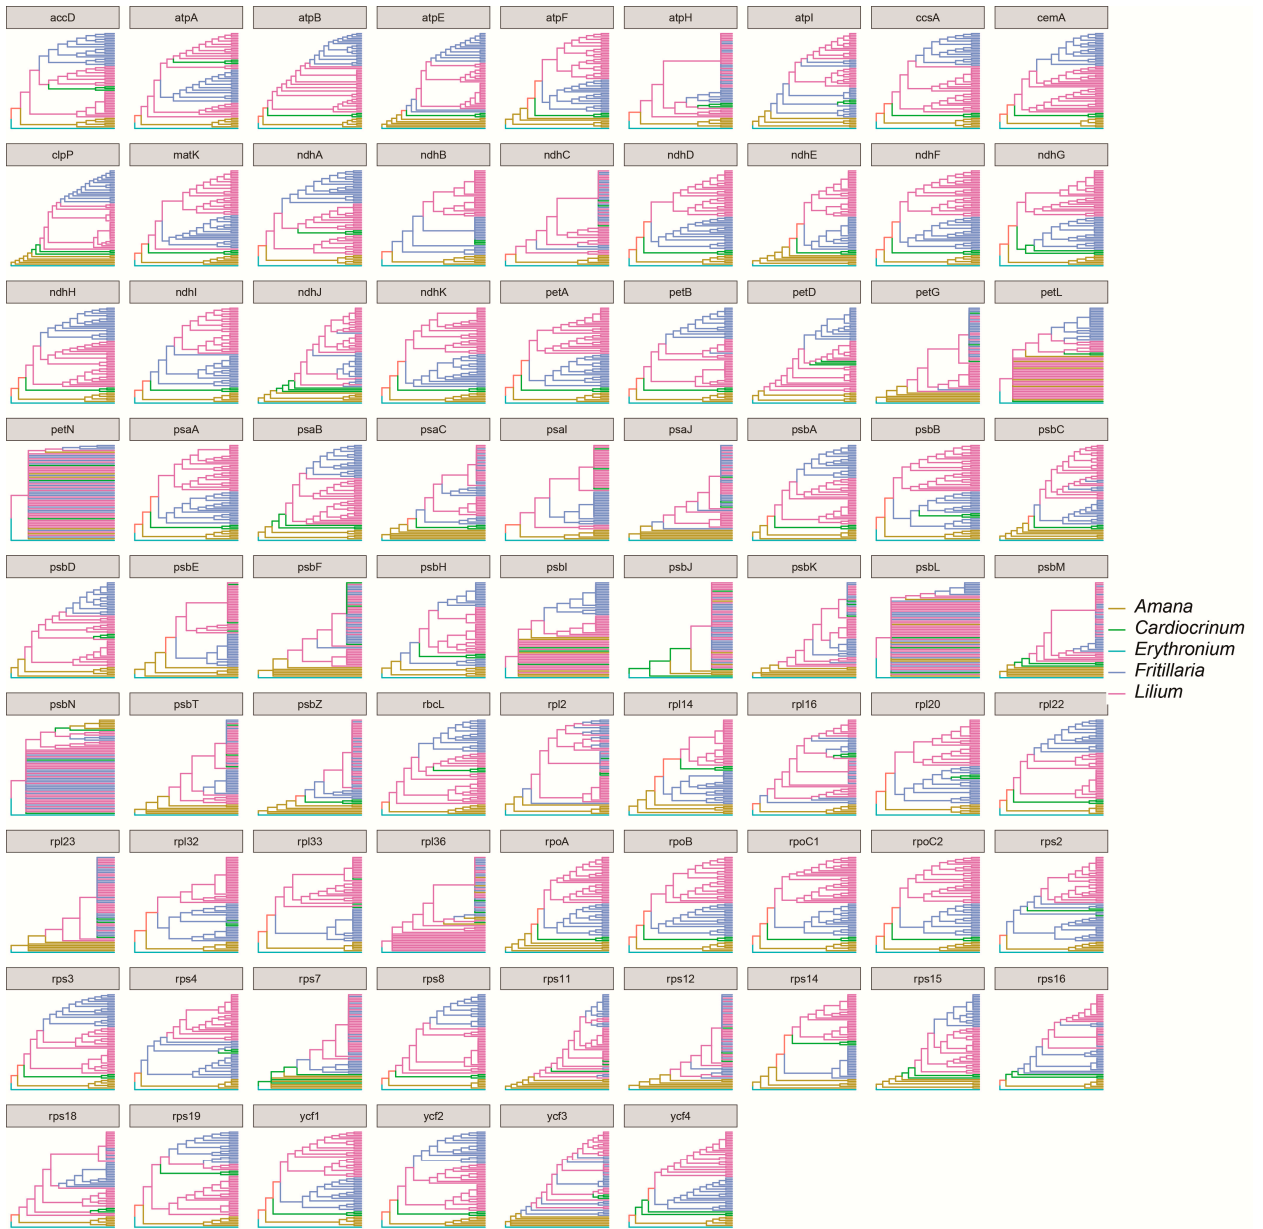

**Figure S2.** Gene trees constructed using 78 coding regions. Coloured line refers to each genus.

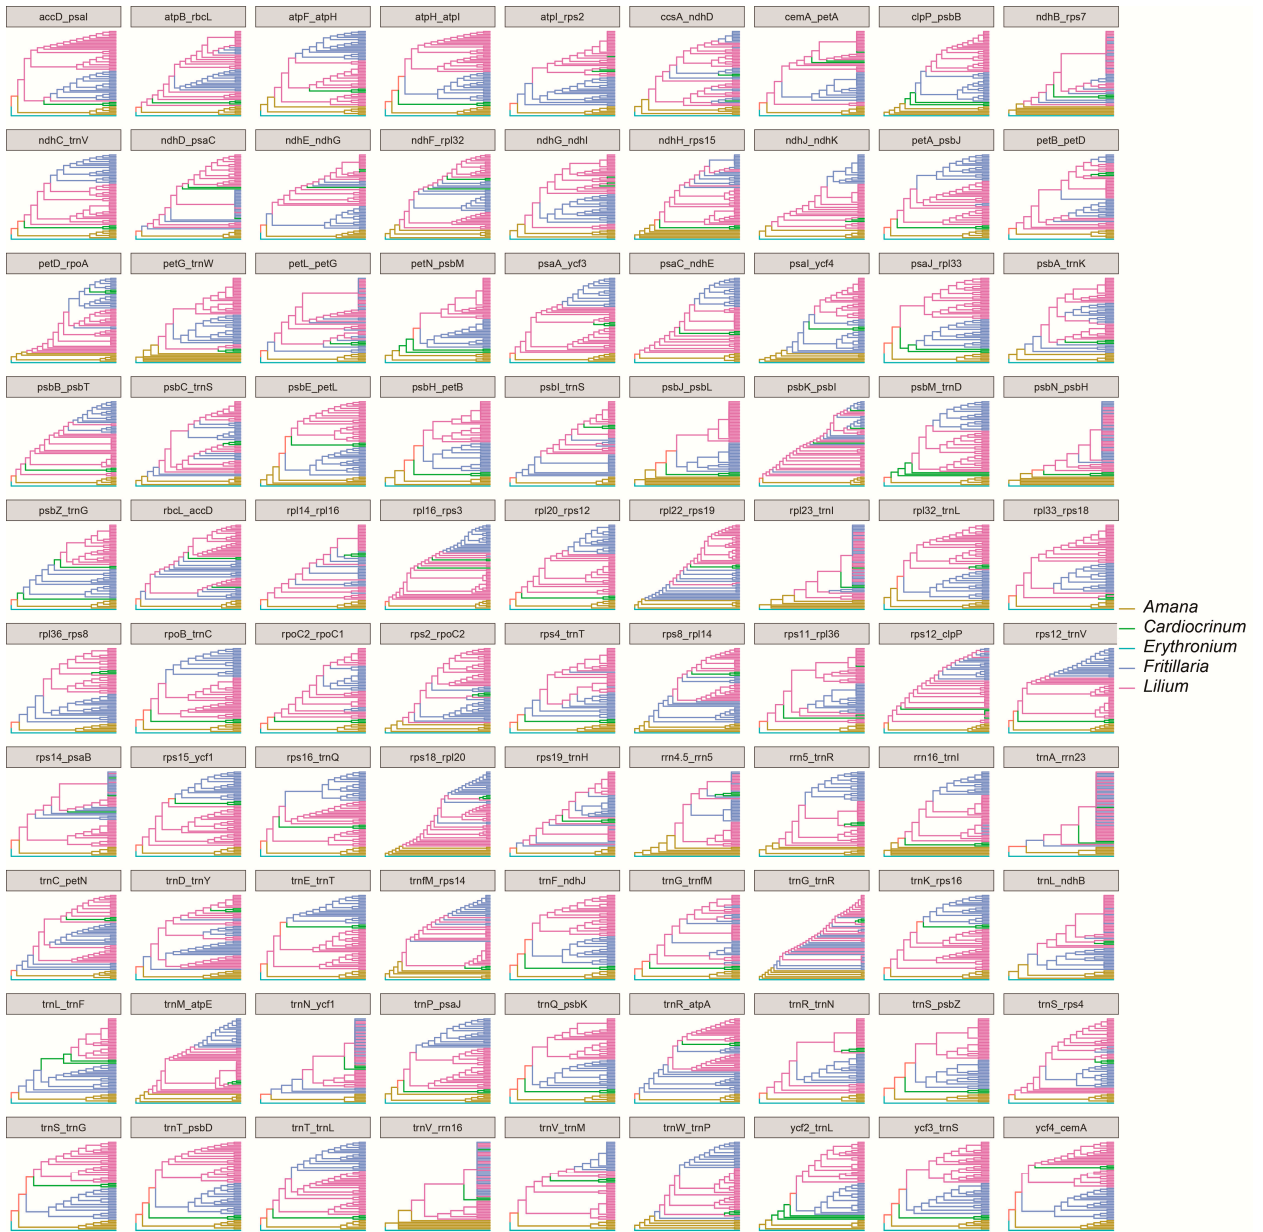

**Figure S3.** Gene trees constructed using 90 intergenic spacers. Coloured line refers to each genus.

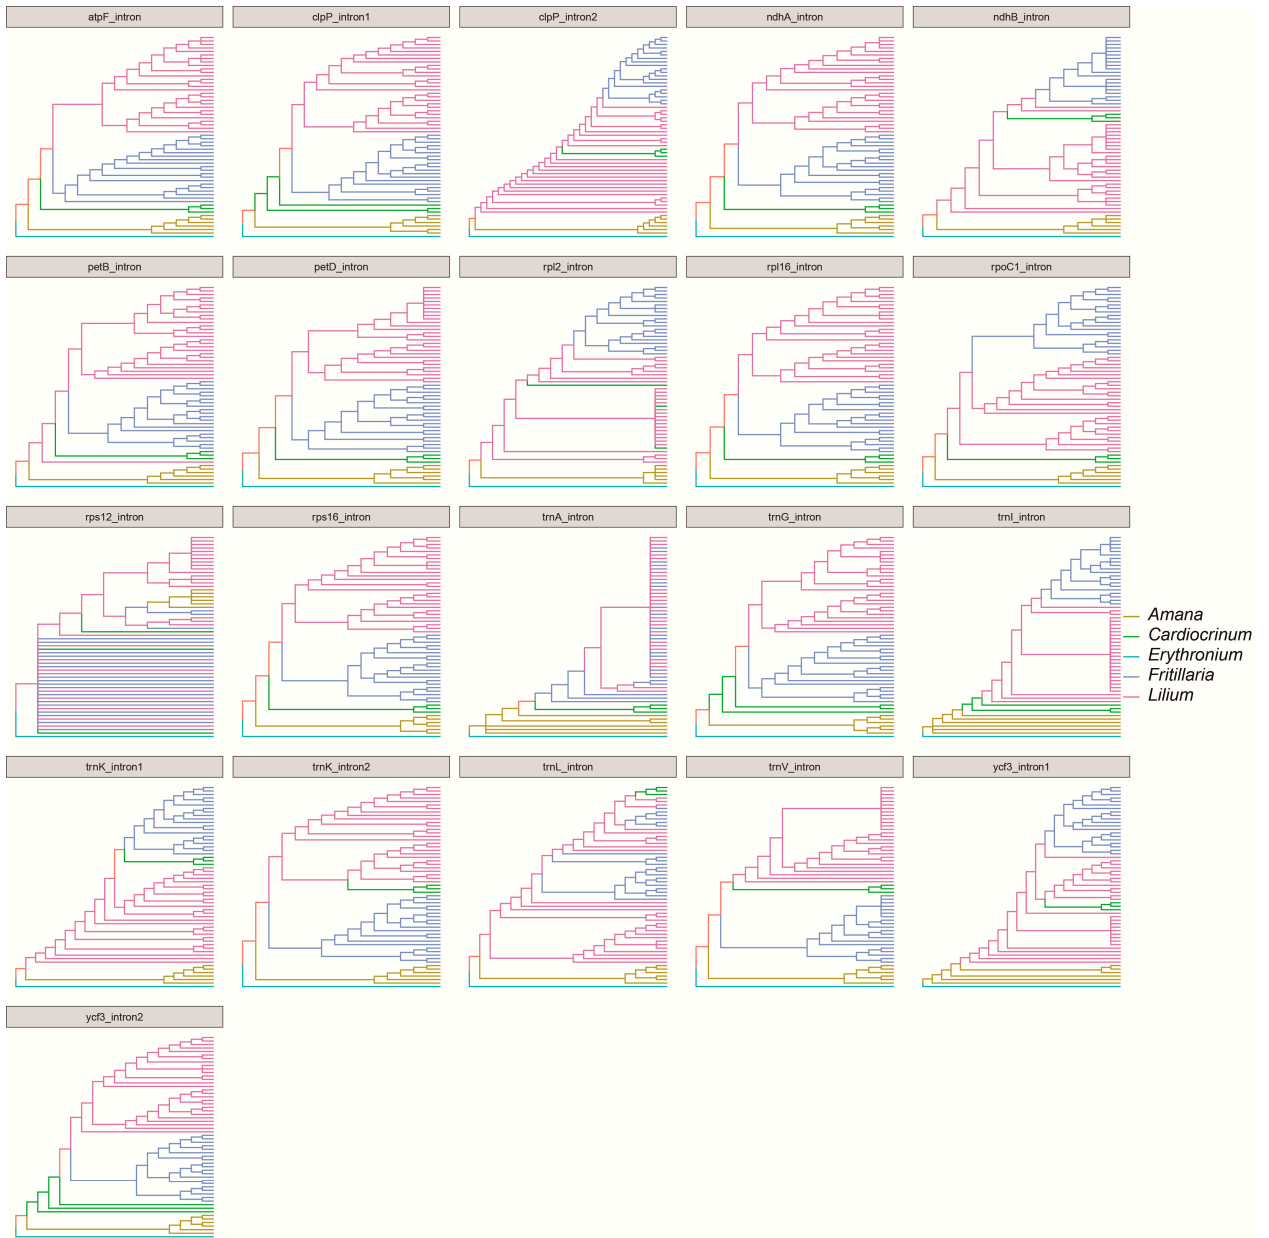

**Figure S4.** Gene trees were constructed using 21 introns. Coloured line refers to each genus.

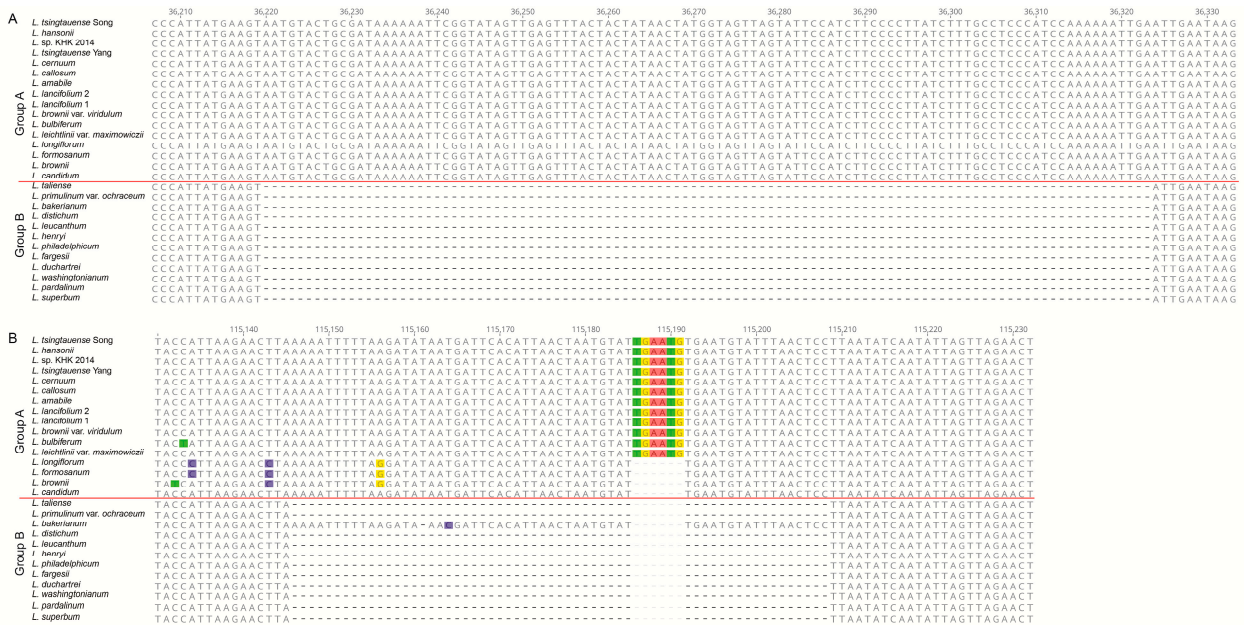

**Figure S5.** Large indertions/deletions occurring at least five species with longer than 50 bp. Red line distinguishes between two groups.
